# Supplementary material for: Dose Effects of Ammonium Perfluorooctanoate on Lipoprotein Metabolism in APOE*3-Leiden.CETP Mice
Source: PubMed Central journal article supplement — Toxicol Sci. 2019 Jan 17;168(2):519–34. doi: 10.1093/toxsci/kfz015 (PMC6432869; doi:10.1093/toxsci/kfz015), 2019-01-17
Supplement: kfz015_supp.pdf [file kfz015_supp.pdf]

**Supplemental material****Suppl. Table I. The number of DEGs in the liver.**

|                         | pval< |      |       | padj< |      |       |
|-------------------------|-------|------|-------|-------|------|-------|
|                         | 0.05  | 0.01 | 0.001 | 0.05  | 0.01 | 0.001 |
| Control vs 10 ng/g/d    | 293   | 63   | 12    | 2     | 2    | 1     |
| Control vs 300 ng/g/d   | 1109  | 379  | 103   | 20    | 4    | 3     |
| Control vs 30000 ng/g/d | 5179  | 3603 | 2364  | 3379  | 2370 | 1640  |

Mice received a Western-type diet without or with 10, 300 or 30000 ng/g/d PFOA, mRNA was isolated from liver tissue, and after further processing next generation sequencing analysis was performed. The table indicates the number of DEGs when compared to control. DEGs depicted in green were used for the pathway analysis in IPA (n = 8 mice per group). Padj < 0.05 indicates a higher level of stringency as compared to Pvalue < 0.01.

DEGs, differentially expressed genes; pval, p-value; padj, adjusted p-value; IPA, ingenuity pathway analysis.

**Suppl. Table II. Hepatic pathways significantly regulated at 30000 ng/g/d PFOA dose.**

| Canonical pathway                            | Related to            | P-value |
|----------------------------------------------|-----------------------|---------|
| FXR/RXR activation                           | lipid metabolism      | 1E-15   |
| LPS/IL-1 mediated inhibition of RXR function | inflammation          | 1E-13   |
| Stearate biosynthesis I (animals)            | lipid metabolism      | 1E-11   |
| Fatty acid $\beta$ -oxidation I              | lipid metabolism      | 1E-10   |
| Coagulation system                           | coagulation           | 1E-10   |
| LXR/RXR activation                           | lipid metabolism      | 1E-9    |
| Acute Phase Response Signaling               | inflammation          | 1E-8    |
| Tryptophan degradation III (Eukaryotic)      |                       | 1E-7    |
| Superpathway of citrulline metabolism        |                       | 1E-7    |
| Complement system                            | inflammation          | 1E-7    |
| Intrinsic prothrombin activation pathway     | coagulation           | 1E-6    |
| Estrogen biosynthesis                        |                       | 1E-6    |
| Bile acid biosynthesis, neutral pathway      | lipid metabolism      | 1E-6    |
| Role of tissue factor in cancer              | coagulation           | 1E-6    |
| Isoleucine degradation I                     |                       | 1E-6    |
| Glutathione-mediated detoxification          |                       | 1E-6    |
| Atherosclerosis signaling                    |                       | 1E-6    |
| Glutaryl-CoA degradation                     |                       | 1E-5    |
| Triacylglycerol biosynthesis                 | lipid metabolism      | 1E-5    |
| Aryl hydrocarbon receptor signaling          | xenobiotic metabolism | 1E-5    |
| Citrulline biosynthesis                      |                       | 1E-5    |
| Nicotine degradation III                     |                       | 1E-5    |
| Xenobiotic metabolism signaling              | xenobiotic metabolism | 1E-5    |
| Superpathway of melatonin degradation        |                       | 1E-5    |
| PXR/RXR activation                           | xenobiotic metabolism | 1E-5    |

Mice received a Western type diet without or with 30000 ng/g/d PFOA, mRNA was isolated from liver tissue and gene expression analysis was performed. Differentially expressed genes (DEGs) (see Supplemental Table I) were used as input for pathway analysis through ingenuity pathway analysis (IPA) suite. All DEGs with an adjusted P-

value  $<0.05$  were used for the analysis. The top 25 most relevant canonical pathways are shown (n = 8 mice per group).

FXR, farnesoid X receptor; RXR, retinoid X receptor; LPS, lipopolysaccharides; LXR, liver X receptor; PXR, pregnane X receptor; DEGs, differentially expressed genes.

**Suppl. Table III. Hepatic pathways significantly regulated at 300 ng/g/d PFOA dose.**

| <b>Canonical pathway</b>                                  | <b>P-value</b> |
|-----------------------------------------------------------|----------------|
| Phagosome formation                                       | 1E-7           |
| Leukocyte extravasation signaling                         | 1E-6           |
| Role of pattern recognition receptors in recognition      | 1E-6           |
| Role of NFAT in regulation of the immune response         | 1E-6           |
| Production of nitric oxide and reactive oxygen species    | 1E-6           |
| FC $\gamma$ receptor-mediated phagocytosis in macrophages | 1E-5           |
| Dendritic cell maturation                                 | 1E-5           |
| Natural killer cell signaling                             | 1E-5           |
| Virus entry via endocytic pathways                        | 1E-5           |
| CD28 signaling in T helper cells                          | 1E-5           |
| IL-8 signaling                                            | 1E-5           |
| TREM1 signaling                                           | 1E-4           |
| CTLA4 signaling in cytotoxic T lymphocytes                | 1E-4           |
| Macropinocytosis signaling                                | 1E-4           |
| T cell receptor signaling                                 | 1E-4           |
| NF- $\kappa$ B activation by viruses                      | 1E-4           |
| Tec kinase signaling                                      | 1E-4           |
| Reelin signaling in neurons                               | 1E-4           |
| Granulocyte adhesion and diapedesis                       | 1E-4           |
| fMLP signaling in neutrophils                             | 1E-4           |
| Epoxy-squalene biosynthesis                               | 1E-4           |
| Endothelin-1 signaling                                    | 1E-4           |
| CD40 signaling                                            | 1E-4           |
| Inflammasome pathway                                      | 1E-3           |
| PKCL signaling in T lymphocytes                           | 1E-3           |

Mice received a Western type diet without or with 300 ng/g/d PFOA, mRNA was isolated from liver tissue and gene expression analysis was performed. Differentially expressed genes (DEGs) (see Supplemental Table I) were used as input for pathway

analysis through ingenuity pathway analysis (IPA) suite. All DEGs with a P-value  $<0.01$  were used for the analysis. The top 25 most relevant canonical pathways are shown (n = 8 mice per group).

DEGs, differential expressed genes.
